# Supplementary material for: Sequence-specific fluorescence turn-on arises from base pairing-templated tautomerism in the tricyclic cytidine analogue DEA tC
Source: Royal Society of Chemistry journal article supplement (doi:10.1039/d5cb00243e), 2025-12-07
Supplement: d5cb00243e2.pdf [file d5cb00243e2.pdf]

## Supplementary Information for

### Sequence-specific fluorescence turn-on arises from base pairing-templated tautomerism in the tricyclic cytidine analogue <sup>DEA</sup>tC

Ana Shalamberidze, Harrison R. Pearce, Andrew L. Cooksy, and Byron W. Purse\*

Department of Chemistry and Biochemistry, San Diego State University, San Diego, CA, USA

\*Correspondence: [bpurse@sdsu.edu](mailto:bpurse@sdsu.edu)

## Contents

|                                                                                                                                                                                                                                                                                   |    |
|-----------------------------------------------------------------------------------------------------------------------------------------------------------------------------------------------------------------------------------------------------------------------------------|----|
| Experimental Procedures.....                                                                                                                                                                                                                                                      | 3  |
| Synthesis of oligonucleotide probes.....                                                                                                                                                                                                                                          | 3  |
| Table S1. <sup>DEA</sup> tC oligonucleotides.....                                                                                                                                                                                                                                 | 3  |
| Table S2. Complementary oligonucleotides.....                                                                                                                                                                                                                                     | 4  |
| Table S3. Sequences of modified complementary oligonucleotides .....                                                                                                                                                                                                              | 4  |
| Steady-state fluorescence spectroscopy to measure emission, excitation.....                                                                                                                                                                                                       | 5  |
| Supplemental Data and Figures.....                                                                                                                                                                                                                                                | 6  |
| Figure S1. Titration of the ssDNA GXC sequence with complementary modified sequences.....                                                                                                                                                                                         | 6  |
| Figure S2. Titration of the ssDNA AXA' sequence with complementary modified sequences.....                                                                                                                                                                                        | 8  |
| Figure S3. Titration of the ssDNA CXA sequence with complementary modified sequences.....                                                                                                                                                                                         | 10 |
| Figure S4. Titration of the ssDNA AXA sequence with complementary modified sequences.....                                                                                                                                                                                         | 12 |
| Figure S5. Absorption (dashed) and excitation (solid; collected using an emission wavelength of 500 nm) of the single-stranded (ss) GXC oligonucleotide and in hybrid duplexes with <sup>DEA</sup> tC base paired with G, A, I, 8-oxo-G, and dSpacer (1',1'-dideoxyribose). ..... | 13 |
| Figure S6. Emission spectra of GXC sequence with modified nucleosides.....                                                                                                                                                                                                        | 14 |
| Figure S7. Emission spectra of AXA' sequence with modified nucleosides.....                                                                                                                                                                                                       | 14 |
| Figure S8. Emission spectra of CXA sequence with modified nucleosides.....                                                                                                                                                                                                        | 14 |

|                                                                                                                                                                               |    |
|-------------------------------------------------------------------------------------------------------------------------------------------------------------------------------|----|
| Figure S9. Emission spectra of AXA sequence with modified nucleosides.....                                                                                                    | 15 |
| Table S4. Paired sequences and relative fluorescence intensity changes for ds DNA oligonucleotides for the AXA, GXC, CXA and AXA' sequences, where X = <sup>DEA</sup> tC..... | 15 |
| Table S5. Steady-State fluorescence measurements of <sup>DEA</sup> tC in single- and double-stranded DNA oligonucleotides for the AXA sequence.....                           | 16 |
| Figure S10. Relative fluorescence intensity of the single-stranded (ss) AXA' and AXA oligonucleotides and their hybrid duplexes.....                                          | 16 |
| Figure S11. Excitation spectra of the single-stranded (ss) AXA' and AXA oligonucleotide and hybrid duplexes.....                                                              | 17 |
| Figure S12. Emission spectra recorded upon excitation at different wavelengths and normalized for the corresponding absorbance intensity for AXA'.....                        | 18 |
| Figure S13. Emission spectra recorded upon excitation at different wavelengths and normalized for the corresponding absorbance intensity for AXA.....                         | 19 |
| Computational Section.....                                                                                                                                                    | 20 |
| Monomer Calculations.....                                                                                                                                                     | 20 |
| Trimer Calculations.....                                                                                                                                                      | 20 |
| Table S6. Optimized molecular geometries of the C-like and T-like tautomer.....                                                                                               | 20 |
| Table S7. Base Stacked and base paired geometries.....                                                                                                                        | 21 |
| Table S8. TD-B3LYP monomer absorption wavelengths and oscillator strengths.....                                                                                               | 23 |
| Table S9. TD-CAM-B3LYP monomer absorption wavelengths and oscillator strengths...                                                                                             | 23 |
| Table S10. TD-B3LYP and TD-CAM-B3LYP absorption data ONIOM and QM.....                                                                                                        | 24 |
| Table S11. Relative tautomer stability and electronic energies.....                                                                                                           | 25 |
| References .....                                                                                                                                                              | 26 |

## Experimental Procedures

### Synthesis of oligonucleotide probes

<sup>DEA</sup>tC-containing oligonucleotides were synthesized by the Keck Oligonucleotide Synthesis Facility at Yale University (New Haven, CT) using the <sup>DEA</sup>tC 2'-deoxyribonucleoside phosphoramidite, prepared in-house according to a published procedure.<sup>1</sup> Solid-phase oligonucleotide synthesis was carried out under standard conditions, employing a 10-fold extended coupling time for the <sup>DEA</sup>tC phosphoramidite. The resulting oligonucleotides were deprotected and purified by HPLC.

Oligonucleotides containing 8-oxo-G, O<sup>6</sup>-MeG, nebularine, or 6mA were similarly synthesized by the Keck Facility, while oligonucleotides containing D-spacer, iso-dG, 2,6-diaminopurine, inosine, and canonical bases were prepared by Integrated DNA Technologies, Inc. (Coralville, IA). Standard solid-phase synthesis and deprotection protocols were used in all cases, except that AMA deprotection conditions were employed for the 8-oxoG oligonucleotide. All modified oligonucleotides were purified and characterized by HPLC.

**Table S1.** Sequences of <sup>DEA</sup>tC oligonucleotides.

| Sequence Name | Sequence (5' to 3') | Calculated Mass | Measured Mass |
|---------------|---------------------|-----------------|---------------|
| GXC           | CGCAGXCTCG          | 3164.5985       | 3165.6        |
| AXA           | CGCAAXATCG          | 3172.6148       | 3173.6        |
| CXA           | CGCACXATCG          | 3148.6036       | 3149.6        |
| AXA'          | CGCAAXATC           | 2843.5623       | 2844.55       |

The position of <sup>DEA</sup>tC is noted by X.

**Table S2.** Sequences of complementary oligonucleotides.

| Complementary Sequence Name | Sequence (5' to 3') | Calculated Mass | Measured Mass |
|-----------------------------|---------------------|-----------------|---------------|
| Match (G)                   | CGAGGCTGCG          | 3069.0          | 3068.70       |
|                             | CGATGTTGCG          | 3059.0          | 3059.00       |
|                             | CGATGGTGCG          | 3084.0          | 3084.10       |
| Mismatch (A)                | CGAGACTGCG          | 3053.0          | 3052.60       |
|                             | CGATATTGCG          | 3043.0          | 3042.80       |
|                             | CGATAGTGCG          | 3068.0          | 3067.80       |
| Inosine (I)                 | CGAG/I/CTGCG        | 3054.0          | 3053.90       |
|                             | CGAT/I/TTGCG        | 3044.0          | 3043.80       |
|                             | CGAT/I/GTGCG        | 3069.0          | 3068.90       |
| Dspacer                     | CGAG/dspacer/CTGCG  | 2919.9          | 2919.80       |
|                             | CGAT/dspacer/TTGCG  | 2909.9          | 2909.90       |
|                             | CGAT/dspacer/GTGCG  | 2934.9          | 2934.80       |
| 2,6-diaminopurine           | CGAG/2,6-dap/CTGCG  | 3068.0          | 3068.00       |
|                             | CGAT/2,6-dap/TTGCG  | 3058.0          | 3057.50       |
|                             | CGAT/2,6-dap/GTGCG  | 3083.1          | 3082.90       |
| isodG                       | CGAG/IsodG/CTGCG    | 3069.0          | 3068.60       |
|                             | CGAT/IsodG/TTGCG    | 3059.0          | 3058.30       |
|                             | CGAT/IsodG/GTGCG    | 3084.0          | 3083.50       |

**Table S3.** Sequences of modified complementary oligonucleotides.

| Complementary Sequence Name | Sequence (5' to 3') | Calculated Mass | Measured Mass |
|-----------------------------|---------------------|-----------------|---------------|
| 8oxoG                       | CGAG/8oxoG/CTGCG    | 3083.5445       | 3084.5        |
|                             | CGAT/8oxoG/TTGCG    | 3073.5377       | 3074.5        |
|                             | CGAT/8oxoG/GTGCG    | 3098.5442       | 3099.5        |
| O6MeG                       | CGAG/O6MeG/CTGCG    | 3081.5652       | 3082.5        |
|                             | CGAT/O6MeG/TTGCG    | 3071.5584       | 3072.5        |
|                             | CGAT/O6MeG/GTGCG    | 3096.5649       | 3097.6        |
| Nebularine                  | CGAG/Neb/CTGCG      | 3036.5438       | 3037.6        |
|                             | CGAT/Neb/TTGCG      | 3026.5370       | 3027.5        |
|                             | CGAT/Neb/GTGCG      | 3051.5434       | 3052.6        |
| 6mA                         | CGAG/N6MeA/CTGCG    | 3065.5703       | 3066.5        |
|                             | CGAT/N6MeA/TTGCG    | 3055.5635       | 3056.5        |
|                             | CGAT/N6MeA/GTGCG    | 3080.5700       | 3081.6        |

### **Steady-state fluorescence spectroscopy to measure emission, excitation, and absorbance**

Oligonucleotides were dissolved in Milli-Q water and 1.5 nmol was suspended in 2 mL  $1 \times$  PBS buffer at pH 7.4 prepared with nuclease-free water (deuterated water was used for solvent isotope effect studies). The single-stranded DNA sequences were titrated with up to 200% complementary sequences to achieve oversaturation and emission spectra were collected at 25% increments. The measurements were taken in quartz sub-micro cuvettes with a 1.0 cm path length (Starnacell Inc.) at 25 °C. Emission and excitation spectra were recorded under steady-state conditions using a PTI QuantaMaster QM-400 fluorometer (Horiba Scientific) and absorbance spectra were measured using a Shimadzu UC-1700 Pharmaspec spectrophotometer. The absorbance of the samples was measured with an initial absorbance near 0.10, approximately 37  $\mu$ M of fluorophore, at 395 nm and the total emission spectrum was collected in the range of 405–680 nm. The excitation spectra were collected at an emission wavelength of 500 nm and in the range of 200–680 nm.

## Supplemental Data and Figures

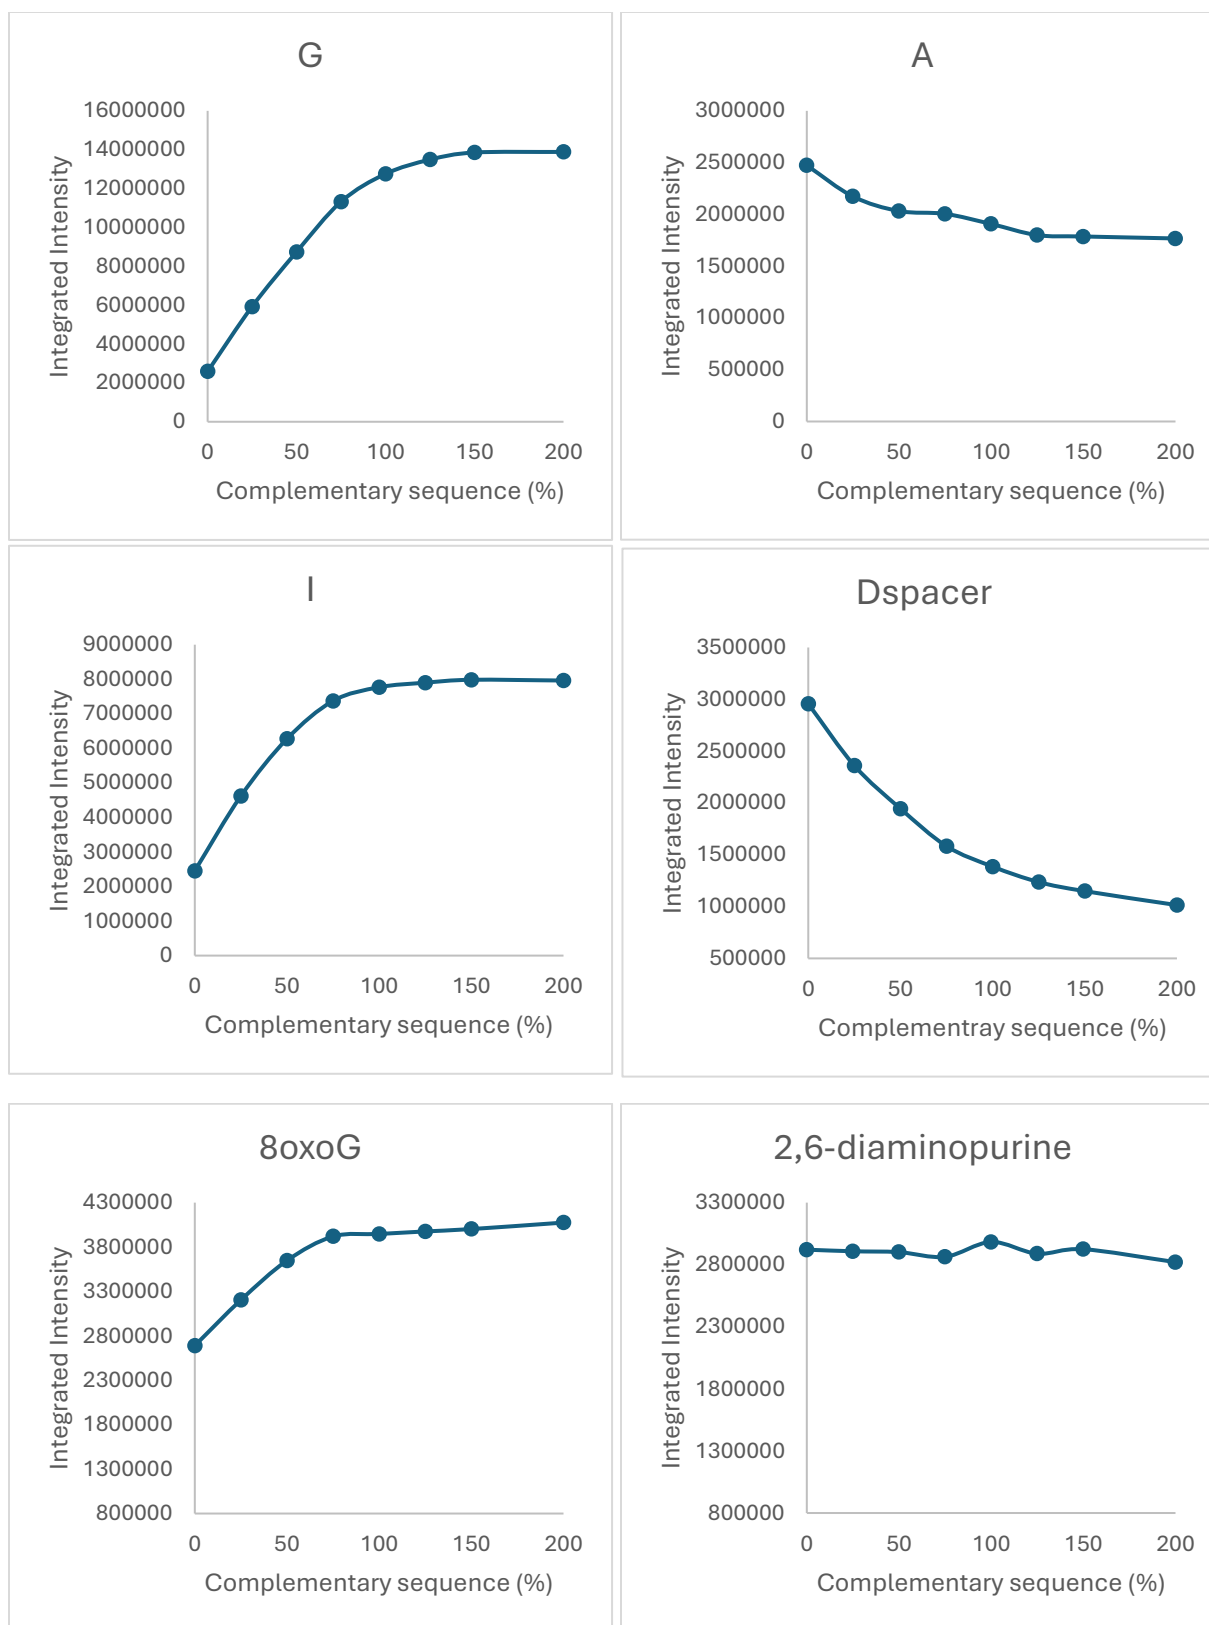

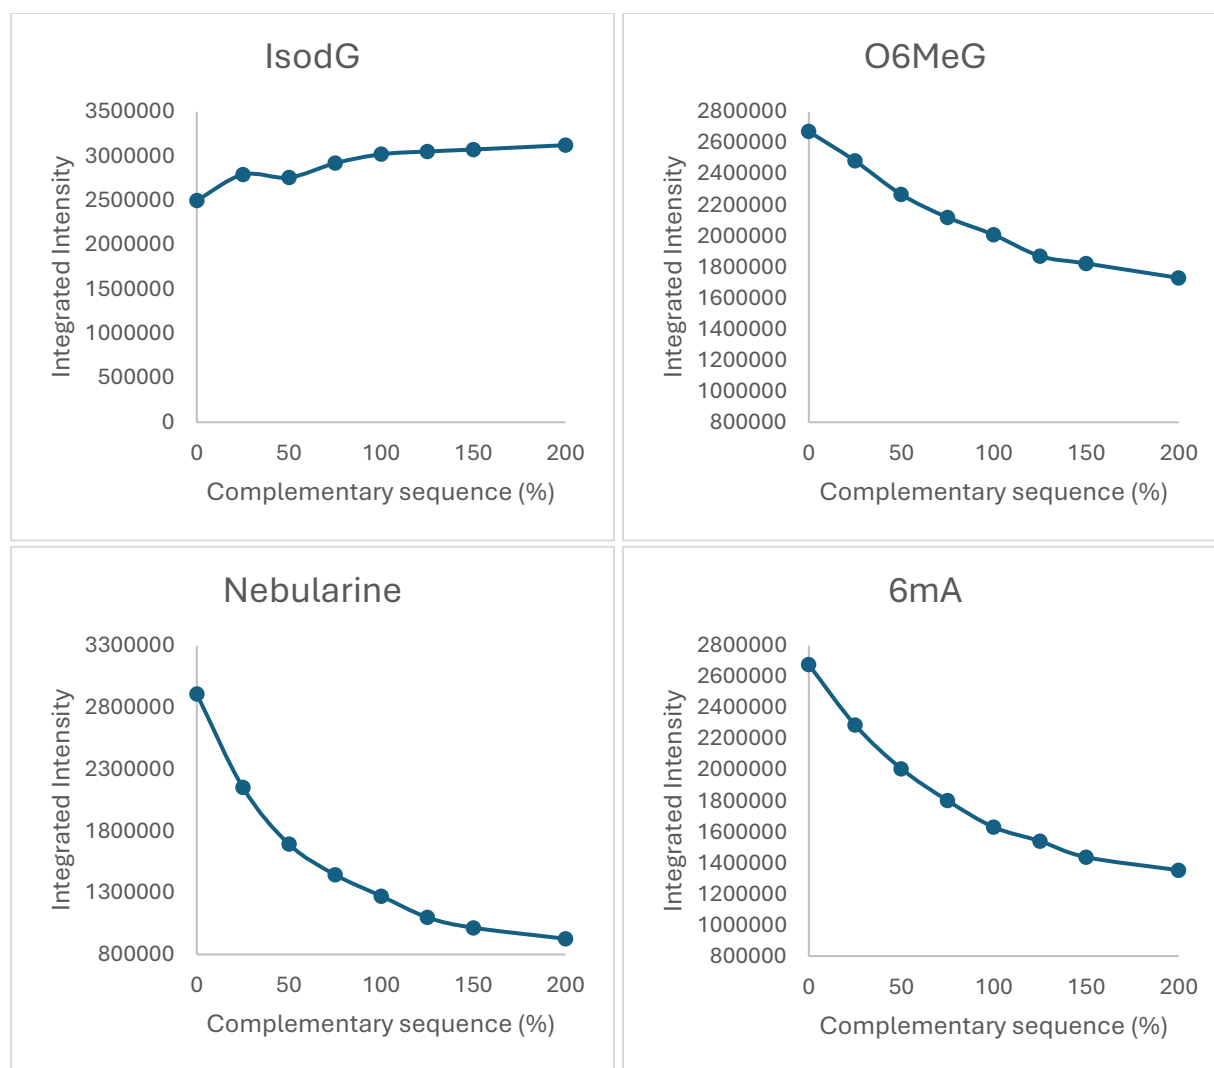

**Figure S1.** Emission of the ssDNA GXC sequence following titration with complementary modified sequences. Data were recorded using  $1\times$  PBS buffer at pH 7.4 with the GXC oligo concentration at  $0.72\ \mu\text{M}$  and the excitation wavelength of 395 nm.

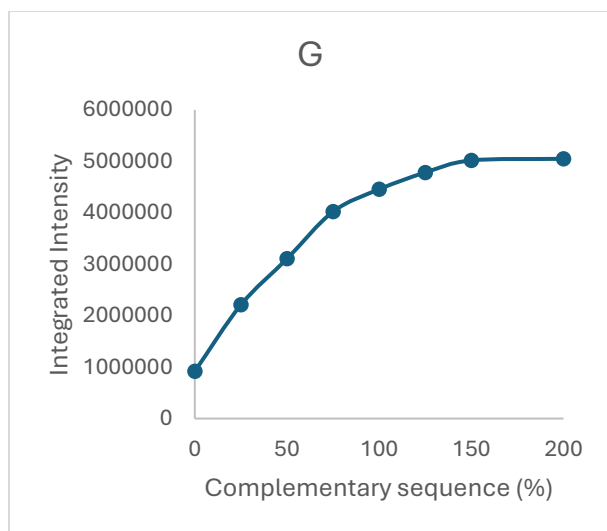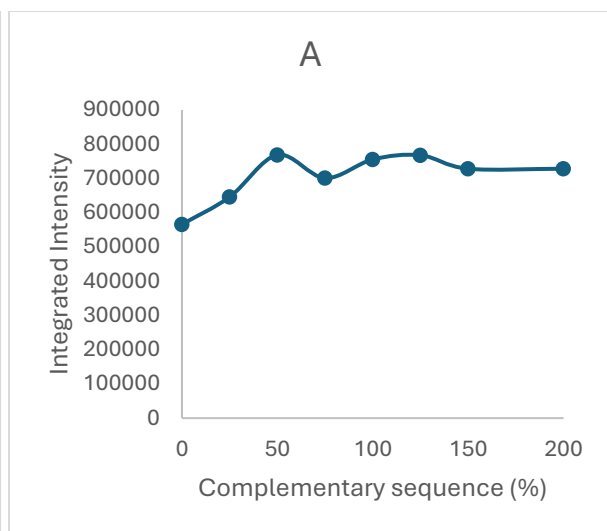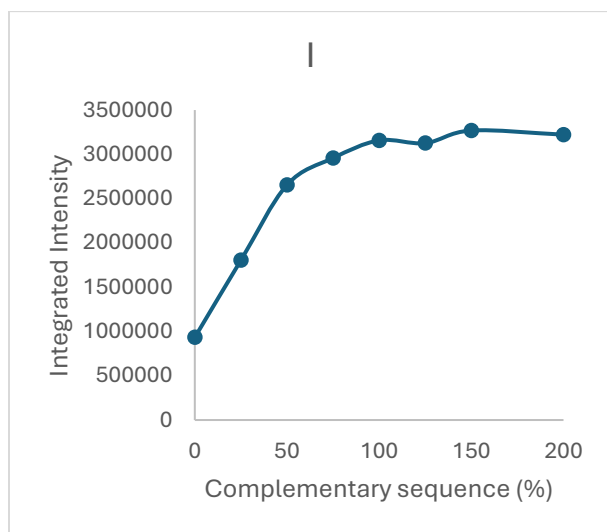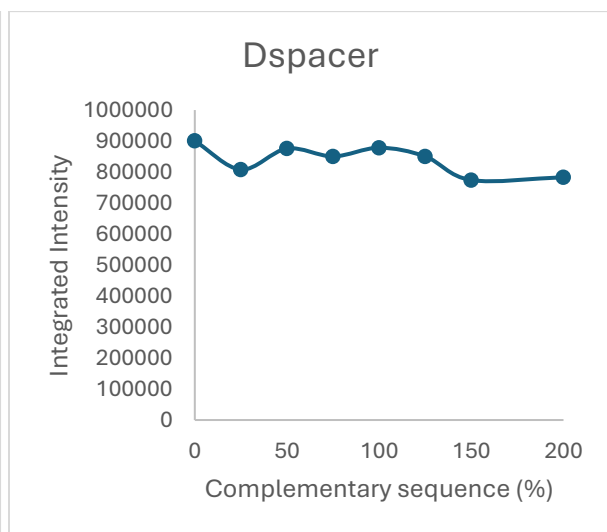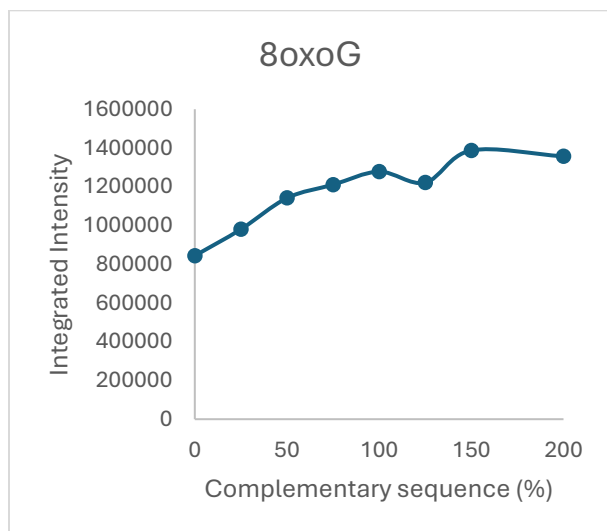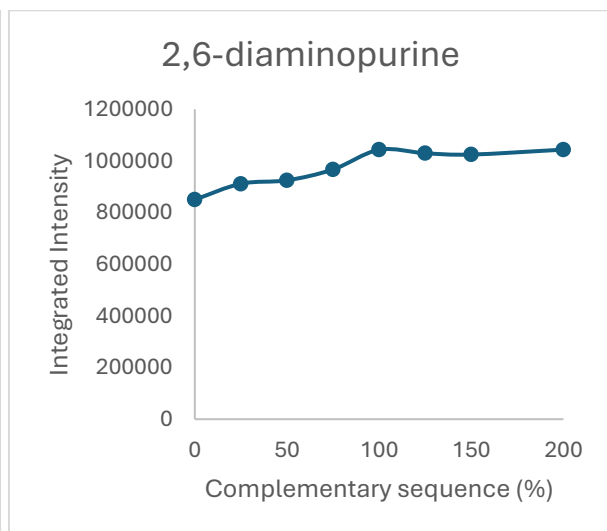



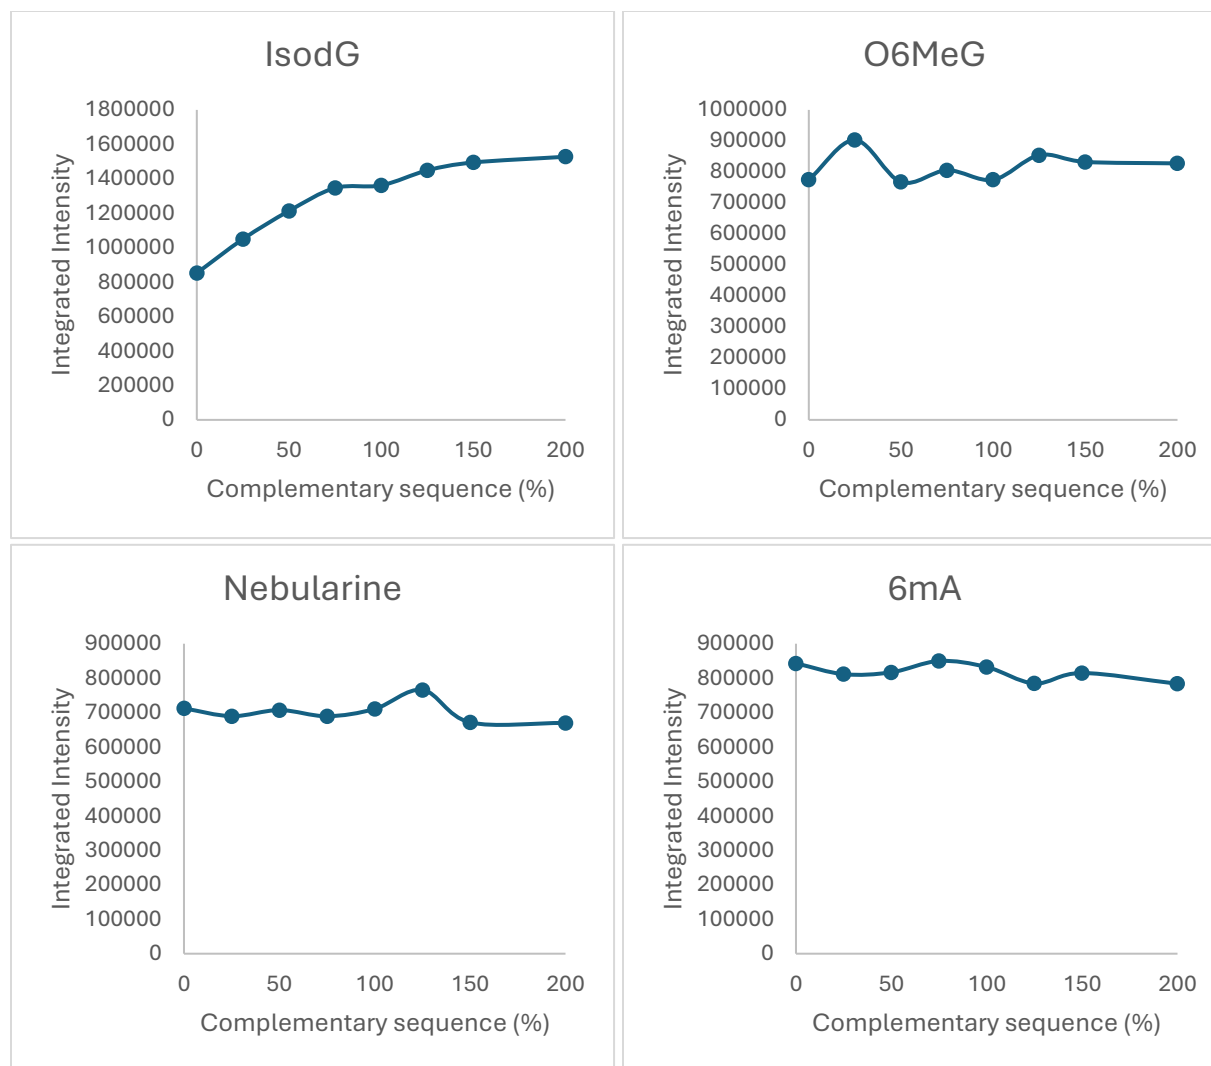

**Figure S2.** Emission of the ssDNA AXA' sequence following titration with complementary modified sequences. Data were recorded using 1× PBS buffer at pH 7.4 with the AXA' oligo concentration at 0.72  $\mu$ M and the excitation wavelength of 395 nm.

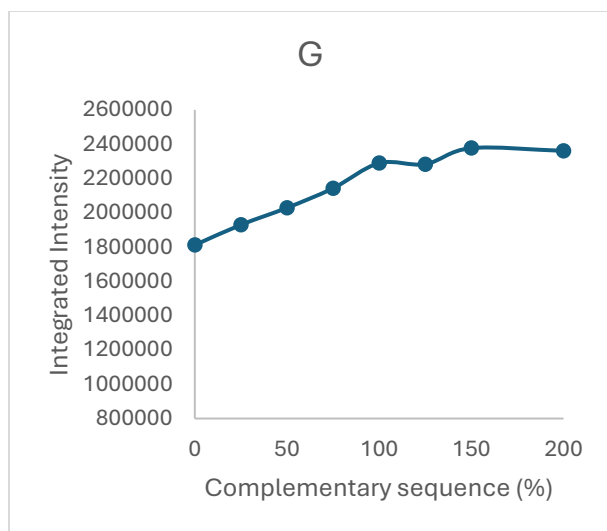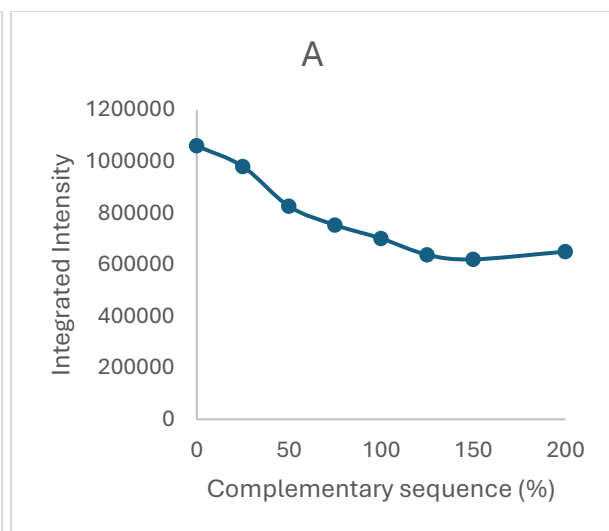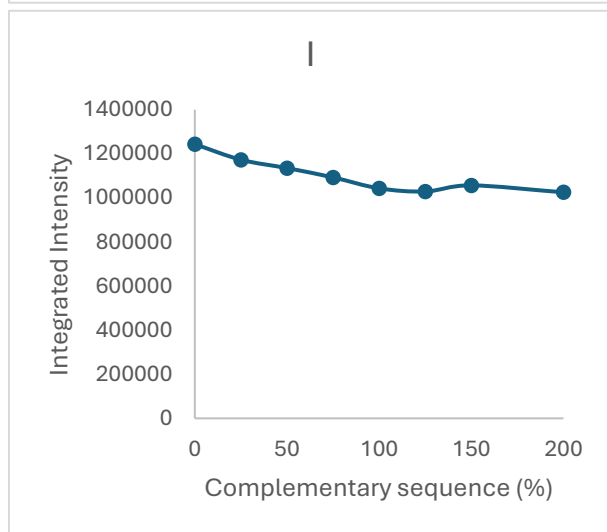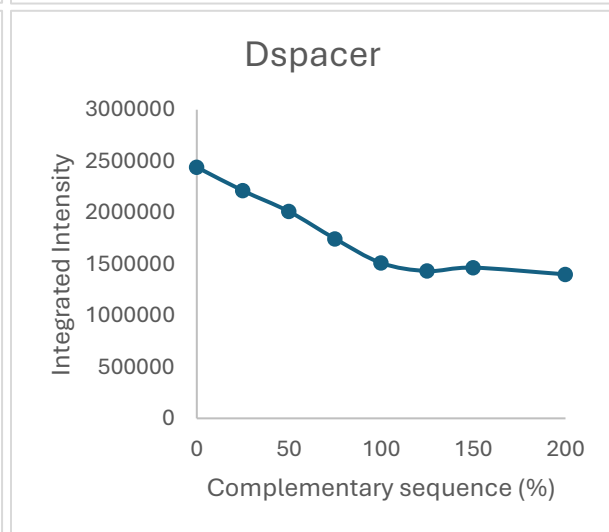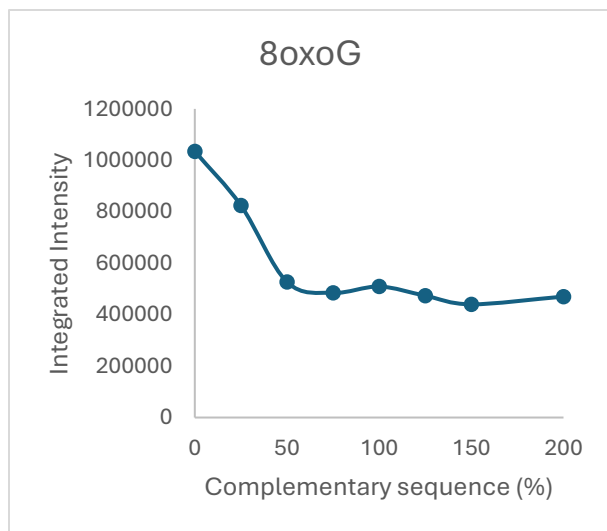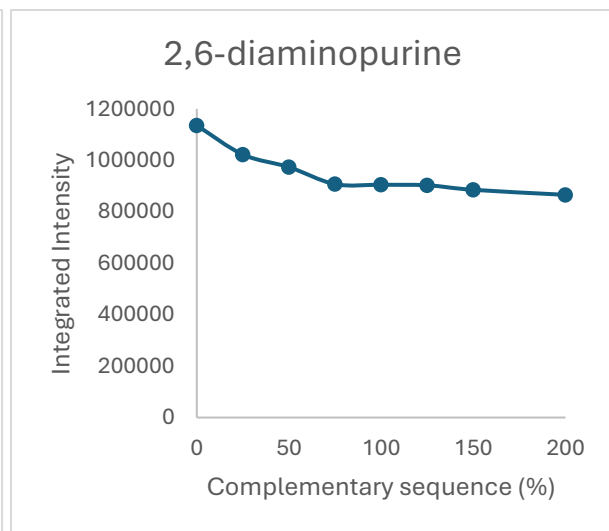

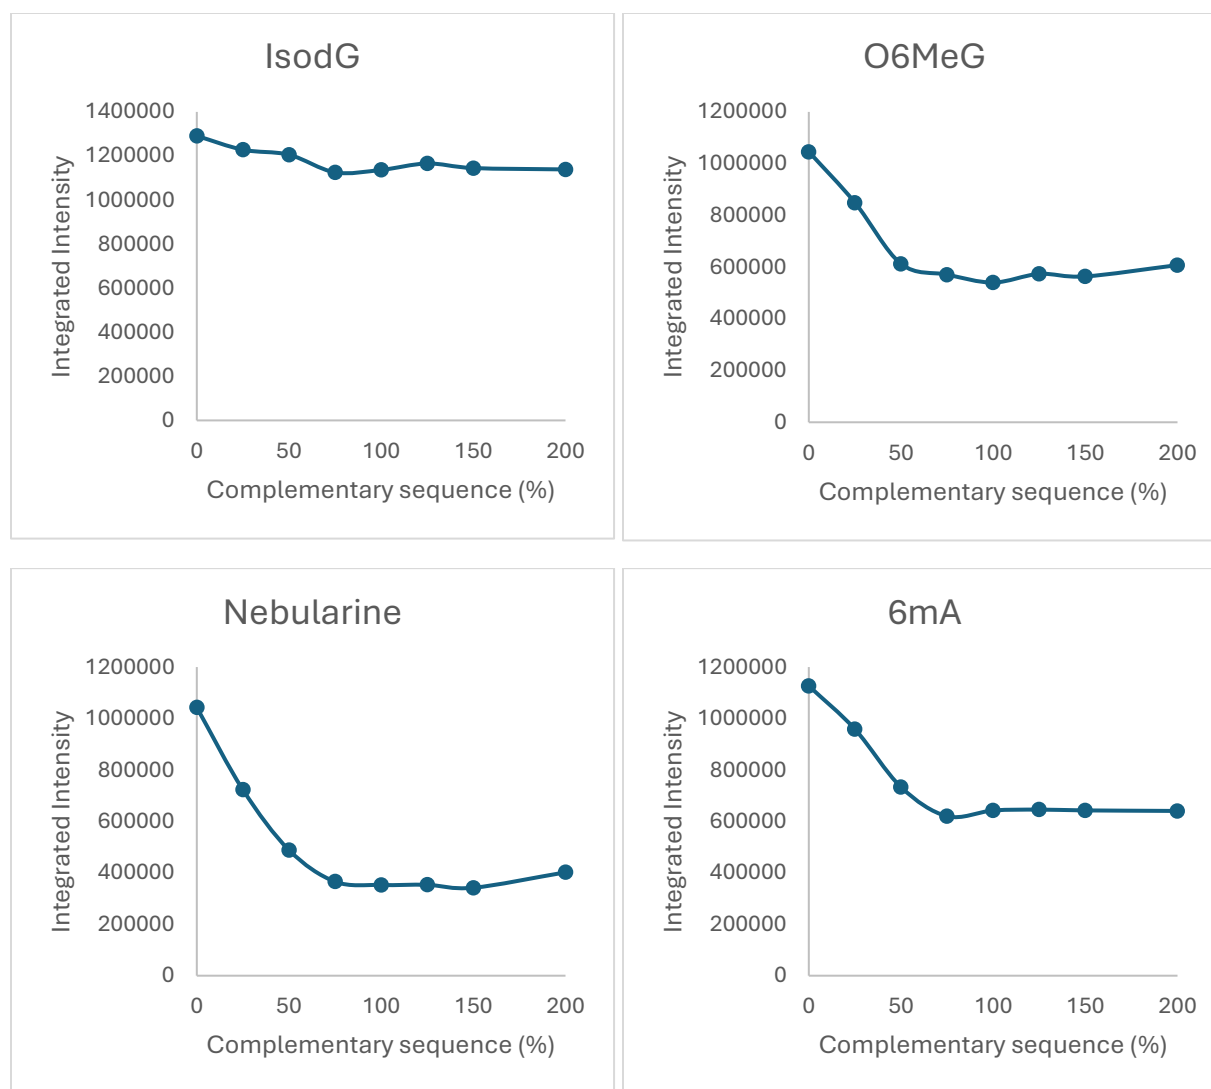

**Figure S3.** Emission of the ssDNA CXA sequence following titration with complementary modified sequences. Data were recorded using 1× PBS buffer at pH 7.4 with the CXA oligo concentration at 0.72  $\mu$ M and the excitation wavelength of 395 nm.

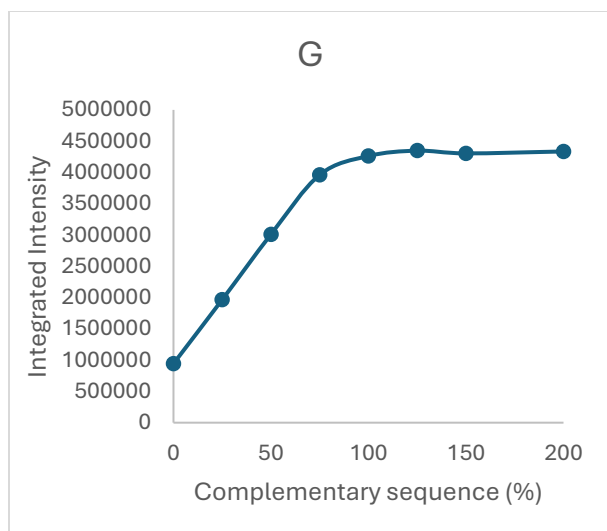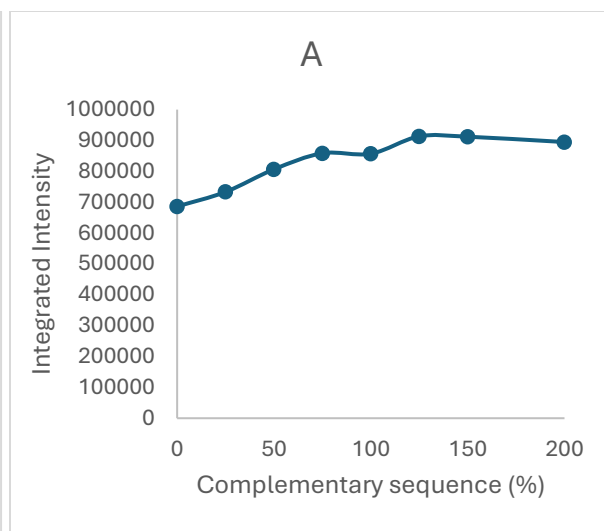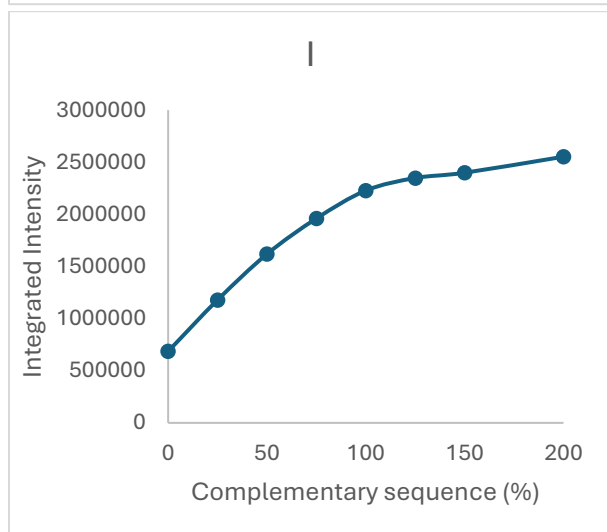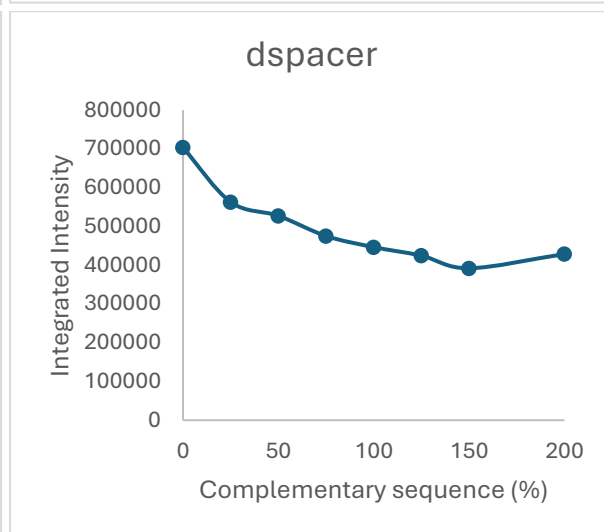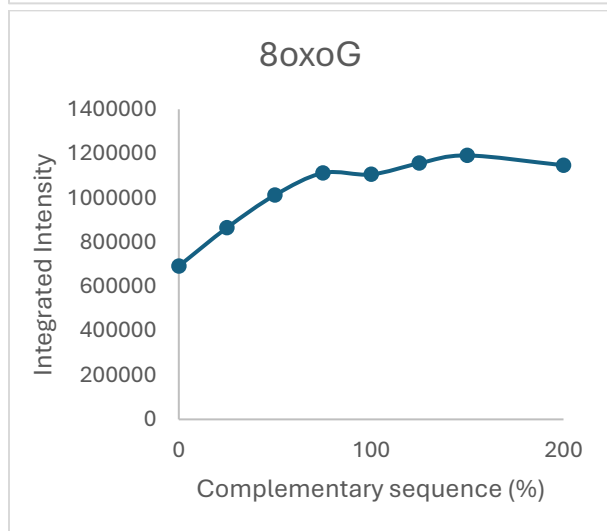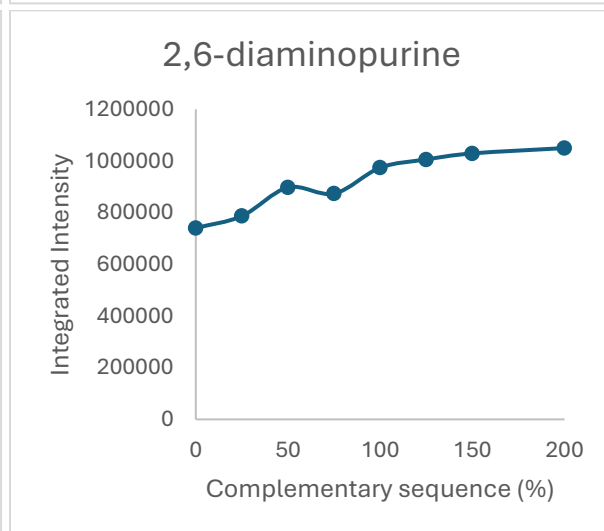

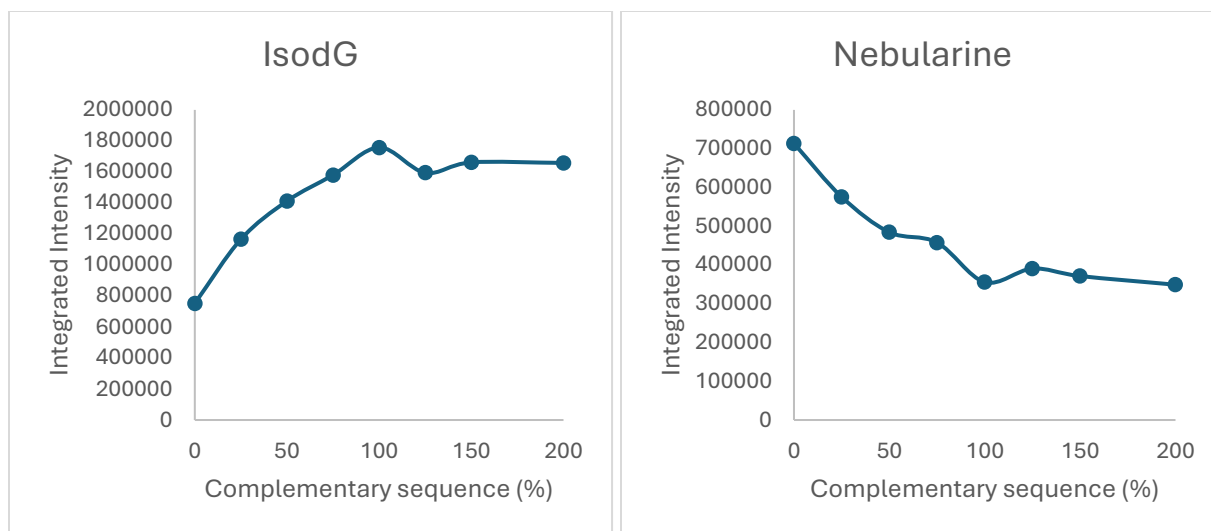

**Figure S4.** Emission of the ssDNA AXA sequence following titration with complementary modified sequences. Data were recorded using 1× PBS buffer at pH 7.4 with the AXA oligo concentration at 0.72  $\mu\text{M}$  and the excitation wavelength of 395 nm.

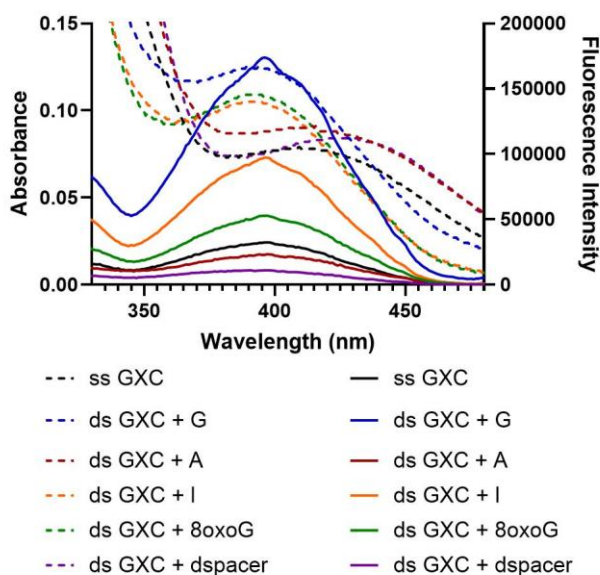

**Figure S5.** Absorption (dashed) and excitation (solid; collected using an emission wavelength of 500 nm) of the single-stranded (ss) GXC oligonucleotide and hybrid duplexes with <sup>DEA</sup>tC base paired with G, A, I, 8-oxo-G, and dSpacer (1',1'-dideoxyribose).

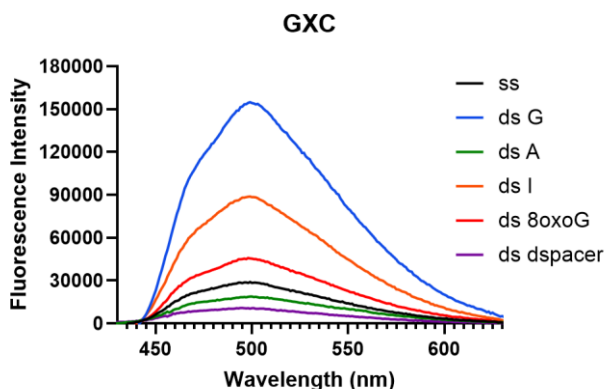

**Figure S6.** Emission spectra of the single-stranded (ss) GXC oligonucleotide and hybrid duplexes with <sup>DEA</sup>tC base paired with G, A, I, 8-oxo-G, and dSpacer (1',1'-dideoxyribose). Emission spectra were recorded in 1× PBS buffer at pH 7.4 and emission spectra were collected using excitation at 395 nm.

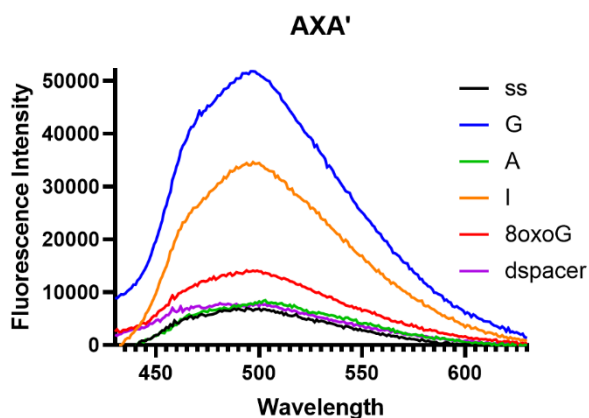

**Figure S7.** Emission spectra of the single-stranded (ss) AXA' oligonucleotide and hybrid duplexes with <sup>DEA</sup>tC base paired with G, A, I, 8-oxo-G, and dSpacer (1',1'-dideoxyribose). Emission spectra were recorded in 1× PBS buffer at pH 7.4 and emission spectra were collected using excitation at 395 nm.

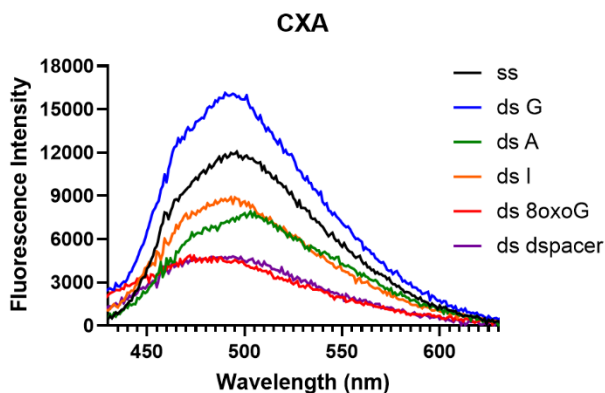

**Figure S8.** Emission spectra of the single-stranded (ss) CXA oligonucleotide and hybrid duplexes with <sup>DEA</sup>tC base paired with G, A, I, 8-oxo-G, and dSpacer (1',1'-dideoxyribose). Emission spectra were recorded in 1× PBS buffer at pH 7.4 and emission spectra were collected using excitation at 395 nm.

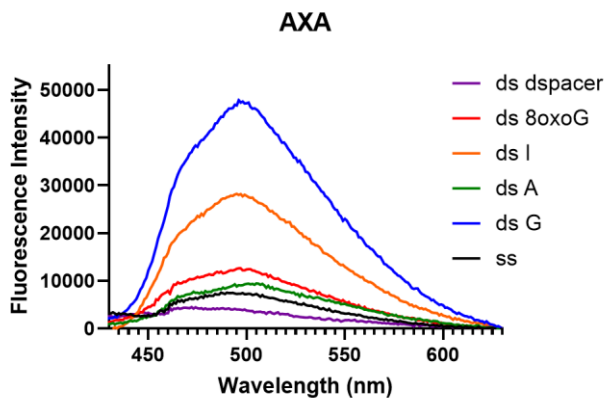

**Figure S9.** Emission spectra of the single-stranded (ss) AXA oligonucleotide and hybrid duplexes with <sup>DEA</sup>tC base paired with G, A, I, 8-oxo-G, and dSpacer (1',1'-dideoxyribose). Emission spectra were recorded in 1× PBS buffer at pH 7.4 and emission spectra were collected using excitation at 395 nm.

**Table S4.** Paired sequences and relative fluorescence intensity changes for double-stranded DNA oligonucleotides for the CXA, AXA, GXC and AXA' sequences, where X = <sup>DEA</sup>tC.

| Bases paired with <sup>DEA</sup> tC in dsDNA | CXA (5'-CGCACXATC G-3') | GXC (5'-CGCAGXCTC G-3') | AXA' (5'-CGCAAXATC-3') | AXA (5'-CGCAAXATC G-3') |
|----------------------------------------------|-------------------------|-------------------------|------------------------|-------------------------|
| ss                                           | 1                       | 1                       | 1                      | 1                       |
| ds G                                         | 1.34                    | 5.42                    | 5.53                   | 4.60                    |
| ds A                                         | 0.66                    | 0.72                    | 1.34                   | 1.30                    |
| ds I                                         | 0.81                    | 3.24                    | 3.44                   | 3.72                    |
| ds 8-oxo-G                                   | 0.45                    | 1.53                    | 1.66                   | 1.66                    |
| ds d-spacer                                  | 0.28                    | 0.32                    | 0.84                   | 0.61                    |
| ds 2,6-dap                                   | 0.76                    | 1.00                    | 1.27                   | 1.42                    |
| ds Iso dG                                    | 0.88                    | 1.27                    | 1.99                   | 2.20                    |
| ds Nebularine                                | 0.46                    | 0.34                    | 0.96                   | 0.49                    |
| ds O6MeG                                     | 0.55                    | 0.65                    | 0.97                   | -                       |
| ds 6mA                                       | 0.54                    | 0.53                    | 1.10                   | -                       |

<sup>a</sup> Fluorescence intensity change is reported as the ratio of the emission intensity of each duplex with respect to ss AXA, GXC, CXA and AXA' using 395 nm excitation. <sup>b</sup> ss = single-stranded. <sup>c</sup> ds G refers to the matched complementary duplex with <sup>DEA</sup>tC base paired with G; other duplex names follow this convention.

**Table S5.** Steady-State fluorescence measurements of <sup>DEA</sup>tC in single- and double-stranded DNA oligonucleotides for the AXA sequence 5'-CGCATXTTCG-3', where X = <sup>DEA</sup>tC.

| Sequence name       | $\lambda_{\text{max}}$ Excitation / nm | $\lambda_{\text{max}}$ Emission / nm | Fluorescence intensity change <sup>a</sup> |
|---------------------|----------------------------------------|--------------------------------------|--------------------------------------------|
| ss AXA <sup>b</sup> | 394                                    | 494                                  | n/a                                        |
| ds G <sup>c</sup>   | 396                                    | 496                                  | 4.60                                       |
| ds A                | 396                                    | 501                                  | 1.30                                       |
| ds I                | 395                                    | 495                                  | 3.72                                       |
| ds 8oxoG            | 394                                    | 496                                  | 1.66                                       |
| ds dspacer          | 395                                    | 488                                  | 0.61                                       |

<sup>a</sup> Fluorescence intensity change is reported as the ratio of the integrated emission intensity of each duplex with respect to ss AXA using 395 nm excitation. <sup>b</sup> ss = single-stranded. <sup>c</sup> ds G refers to the matched complementary duplex with <sup>DEA</sup>tC base paired with G; other duplex names follow this convention.

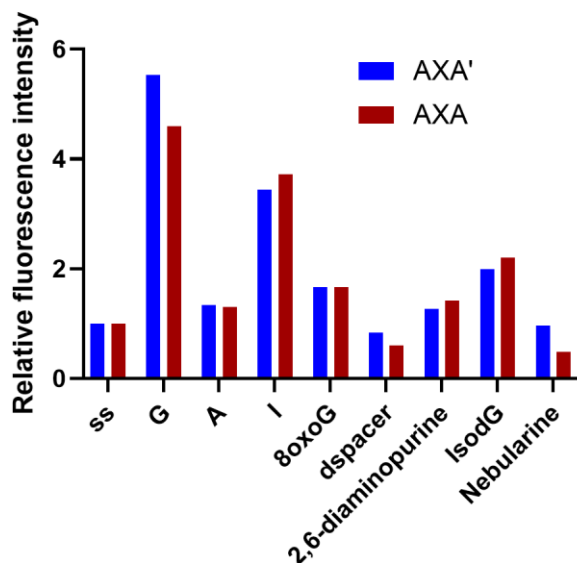

**Figure S10.** Relative fluorescence intensity of the single-stranded (ss) AXA' and AXA oligonucleotides and their hybrid duplexes with G, A, and noncanonical nucleobases. Fluorescence intensity change is reported as the ratio of the integrated emission intensity of each duplex with respect to the <sup>DEA</sup>tC-containing single strand, using 395 nm excitation.



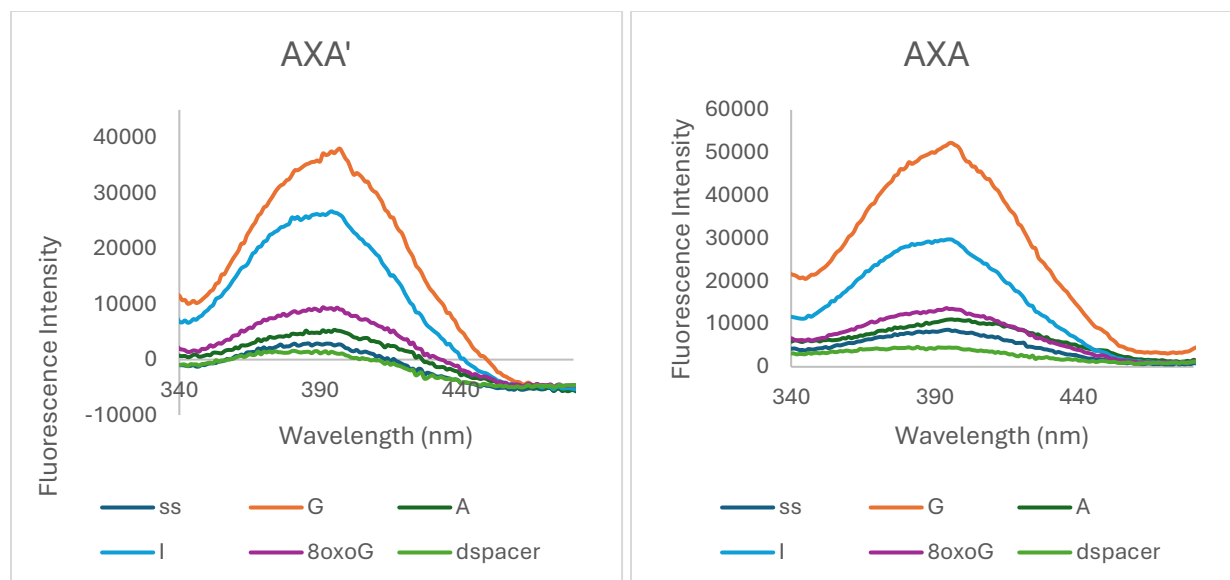

**Figure S11.** Excitation spectra of the single-stranded (ss) AXA' and AXA oligonucleotide and hybrid duplexes with <sup>DEA</sup>tC base paired with G, A, I, 8-oxo-G, and dSpacer (1',1'-dideoxyribose) collected using an emission wavelength of 500 nm.

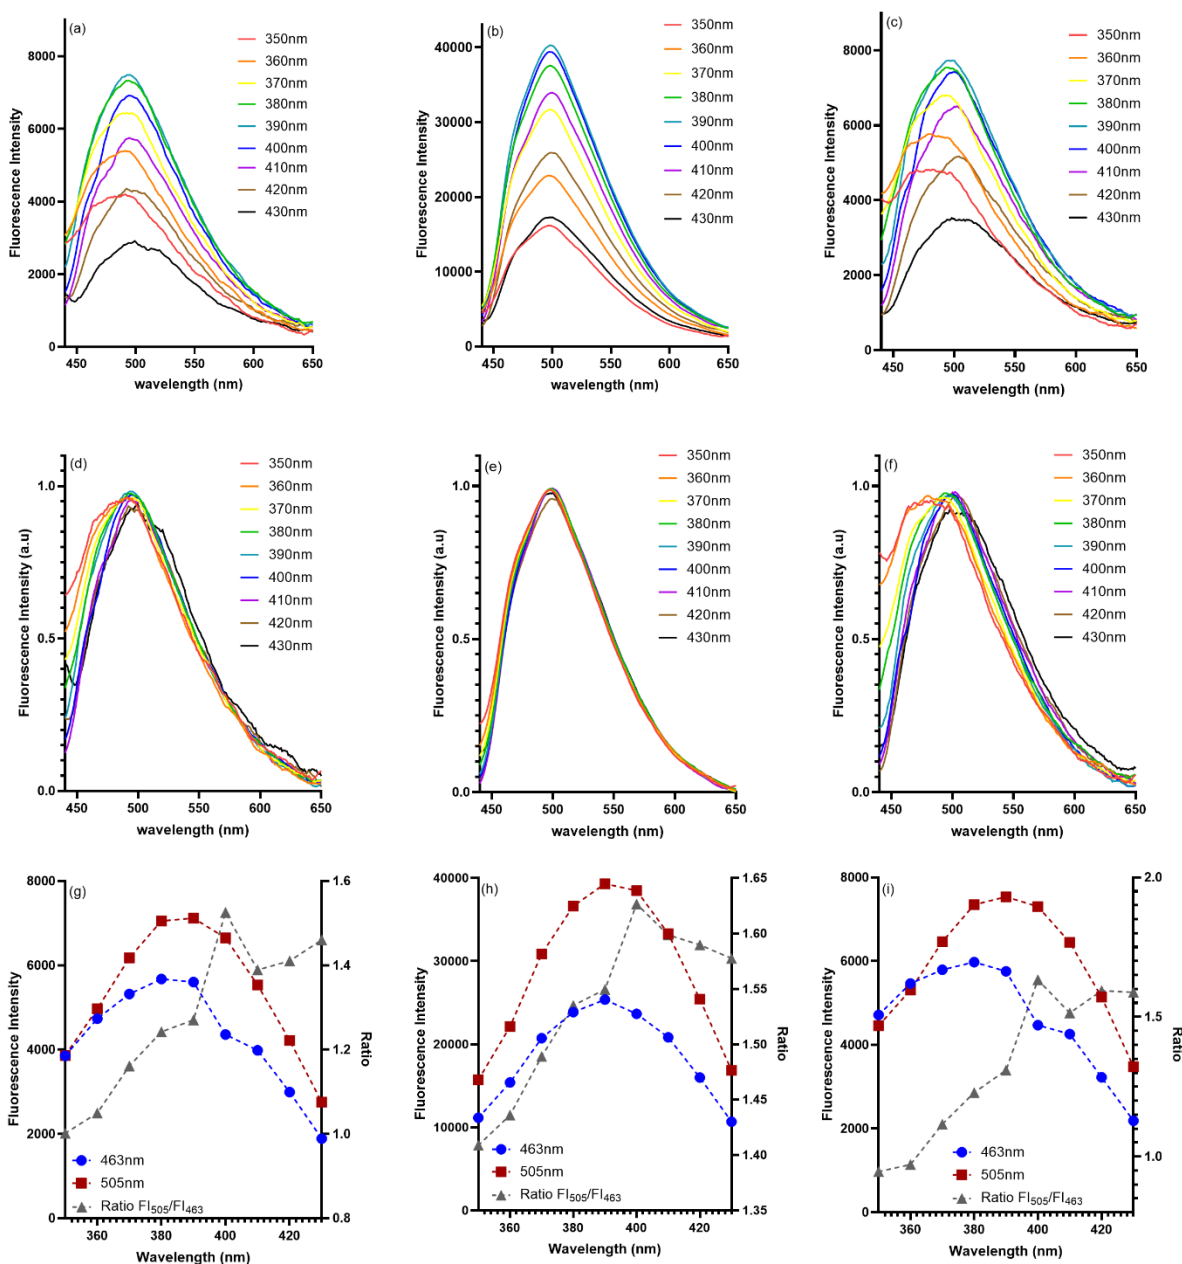

**Figure S12.** Emission spectra recorded upon excitation at different wavelengths and normalized for the corresponding absorbance intensity (a, b and c) or normalized to unit in intensity (d, e and f) for aqueous solutions of ss AXA', AXA' hybrid duplex with <sup>DEA</sup>tC paired with G, AXA' hybrid duplex with <sup>DEA</sup>tC paired with A respectively. Extrapolated excitation spectra by plotting the emission spectra intensities at selected wavelengths (463 and 505nm) upon excitation at different wavelengths (g, h and i) of aqueous solutions of ss AXA', AXA' hybrid duplex with <sup>DEA</sup>tC paired with G, AXA' hybrid duplex with <sup>DEA</sup>tC paired with A

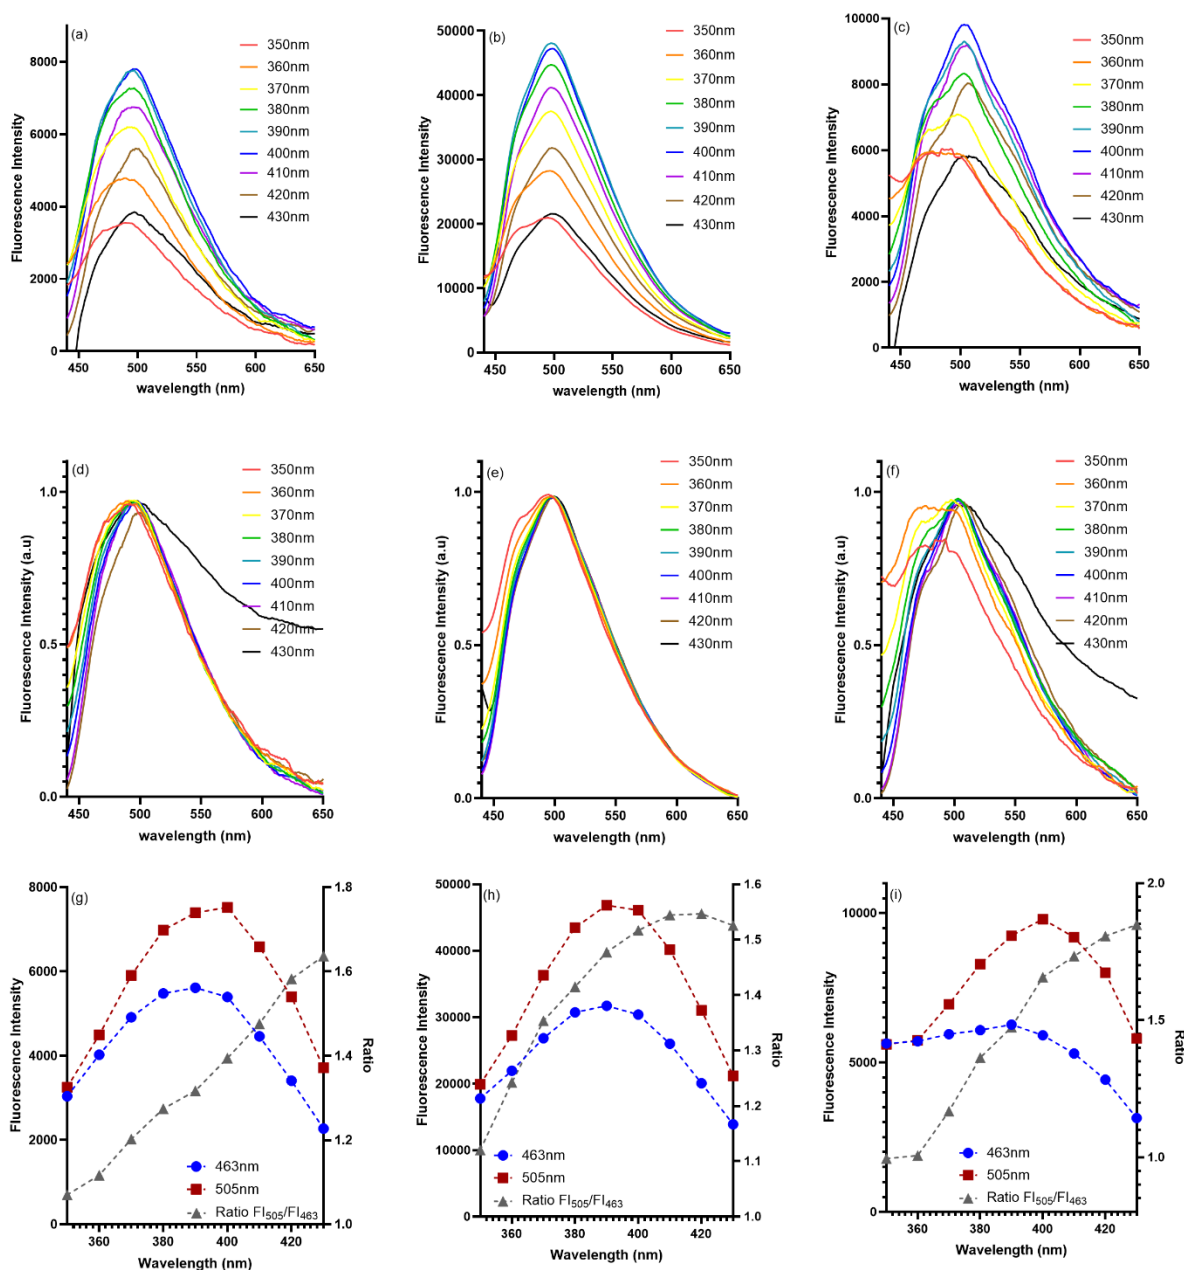

**Figure S13.** Emission spectra recorded upon excitation at different wavelengths and normalized for the corresponding absorbance intensity (a, b and c) or normalized to unit in intensity (d, e and f) for aqueous solutions of ss AXA, AXA hybrid duplex with <sup>DEA</sup>tC paired with G, AXA hybrid duplex with <sup>DEA</sup>tC paired with A respectively. Extrapolated excitation spectra by plotting the emission spectra intensities at selected wavelengths (463 and 505nm) upon excitation at different wavelengths (g, h and i) of aqueous solutions of ss AXA, AXA hybrid duplex with <sup>DEA</sup>tC paired with G, AXA hybrid duplex with <sup>DEA</sup>tC paired with A

## Computational Section

### Monomer Calculations

<sup>DEA</sup>tC tautomer models were created in GaussView 6<sup>2</sup> with the approximation that the 1' carbon was replaced with a methyl group. All subsequent calculations were completed with Gaussian16 version C.01.<sup>3</sup> The monomers were optimized at the B3LYP-D3(BJ)/cc-pVDZ/SMD level, with water as the implicit solvent. Frequency calculations were carried out to ensure that the geometries were at a minimum on the potential energy surface. The resulting monomers were slightly non-planar, with a bend running through nitrogen and sulfur atoms in the central ring of both tautomers. TD-CAM-B3LYP/aug-cc-pVDZ/SMD and TD-B3LYP/aug-cc-pVDZ/SMD single point calculations were carried out on the optimized geometries.

**Table S6.** Optimized molecular geometries of the C-like and T-like tautomers.

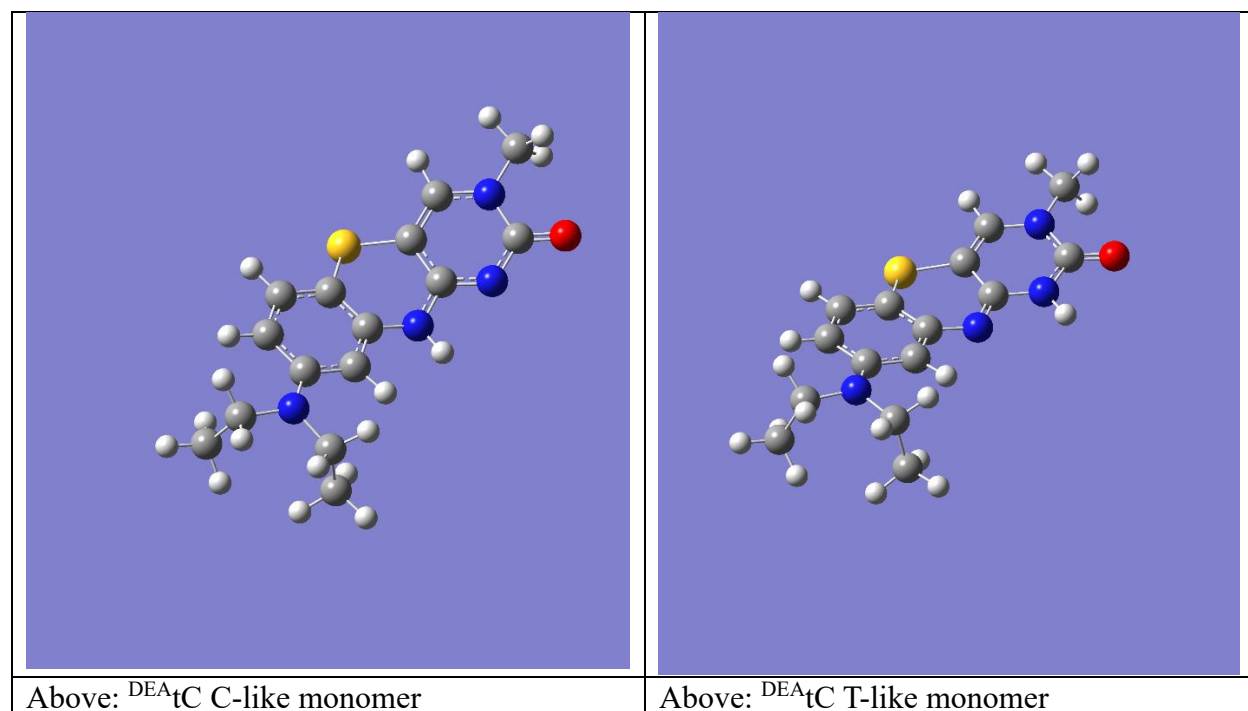

### Trimer Calculations

An ACA trimer sequence was created with an online tool<sup>4</sup> from the Supercomputing Facility for Bioinformatics and Computational Biology, IIT Delhi, which uses parameters from an experimental study.<sup>5</sup> The cytosine monomer was modified in GaussView 6 to create a model of <sup>DEA</sup>tC. The added atoms were made non-planar in the central ring to avoid an imaginary bending mode associated with planarity in the <sup>DEA</sup>tC which was found in the monomers. All atoms other than the atoms attached to cytosine were frozen and the model was optimized with a UFF

forcefield. The <sup>DEA</sup>tC nucleobase and guanosine were unfrozen, whereas the deoxyriboses were kept frozen. The linked atoms were kept unfrozen so that frequencies could be calculated. The guanosine was manually modified to form adenine or inosine for the base paired sequences with adenine or inosine. The trimer models were optimized with an ONIOM model, with the high layer consisting of B3LYP-D3(BJ)/cc-pVDZ and the low layer consisting of a UFF forcefield. D3(BJ) parameters had to be specified in Gaussian due to the presence of the UFF molecular mechanics method in the ONIOM calculation, and the parameters chosen were the Gaussian 16 default parameters (S8=1.9889, ABJ1=0.3981, ABJ2=4.4211). In the <sup>DEA</sup>tC T-like tautomer and adenine base pairing model, self-consistent field (SCF) convergence issues arose due to solvent cavity issues, and the SMD cavity was initially changed from the default van der Waals (vdW) radius to the solvent accessible surface (SAS) for optimization and subsequently changed back to the vdW radius and re-optimized. Finally, single-point ONIOM calculations were carried out with B3LYP-D3(BJ)/aug-cc-pVDZ SMD:UFF, TD-B3LYP-D3(BJ)/aug-cc-pVDZ SMD:UFF, and TD-CAM-B3LYP-D3(BJ)/aug-cc-pVDZ SMD:UFF.

**Table S7.** Optimized molecular geometries of the C-like and T-like tautomers in base paired and base stacked ONIOM calculations with implicit solvent. Optimizations were carried out at the B3LYP-D3(BJ)/cc-pVDZ/SMD:UFF level with the low level frozen. The low level is depicted below in wireframe.

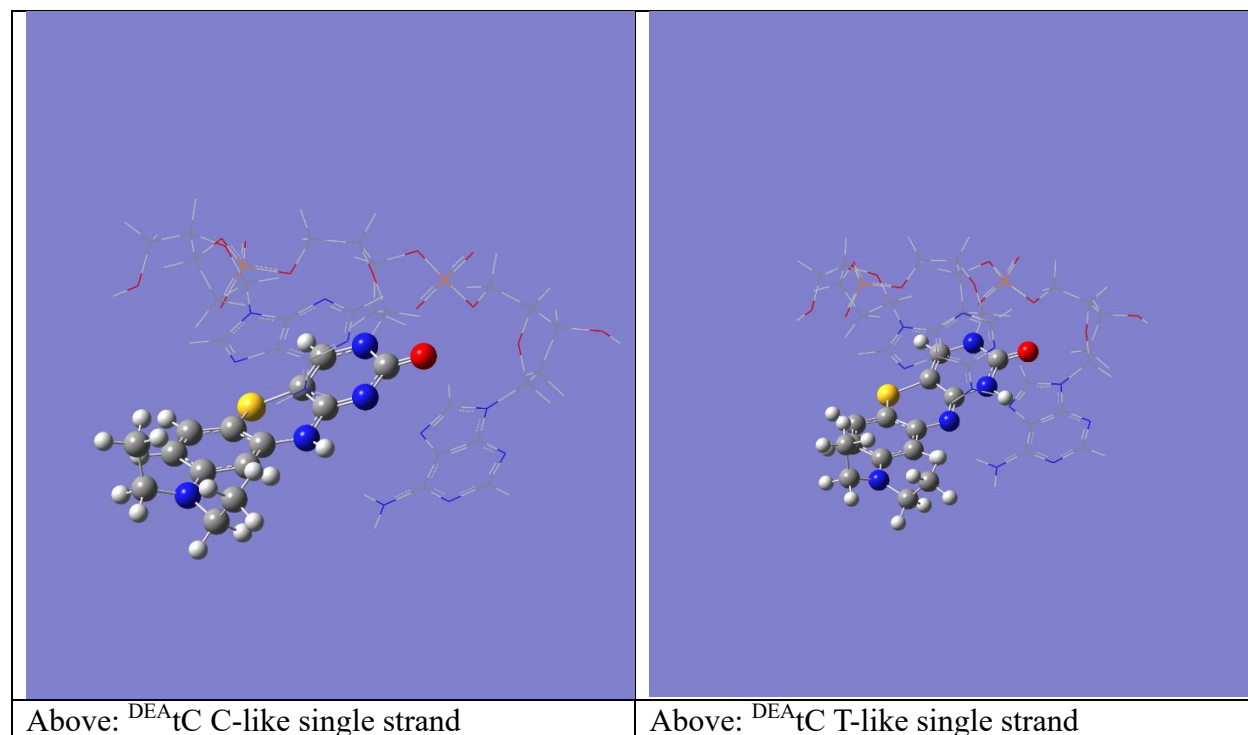

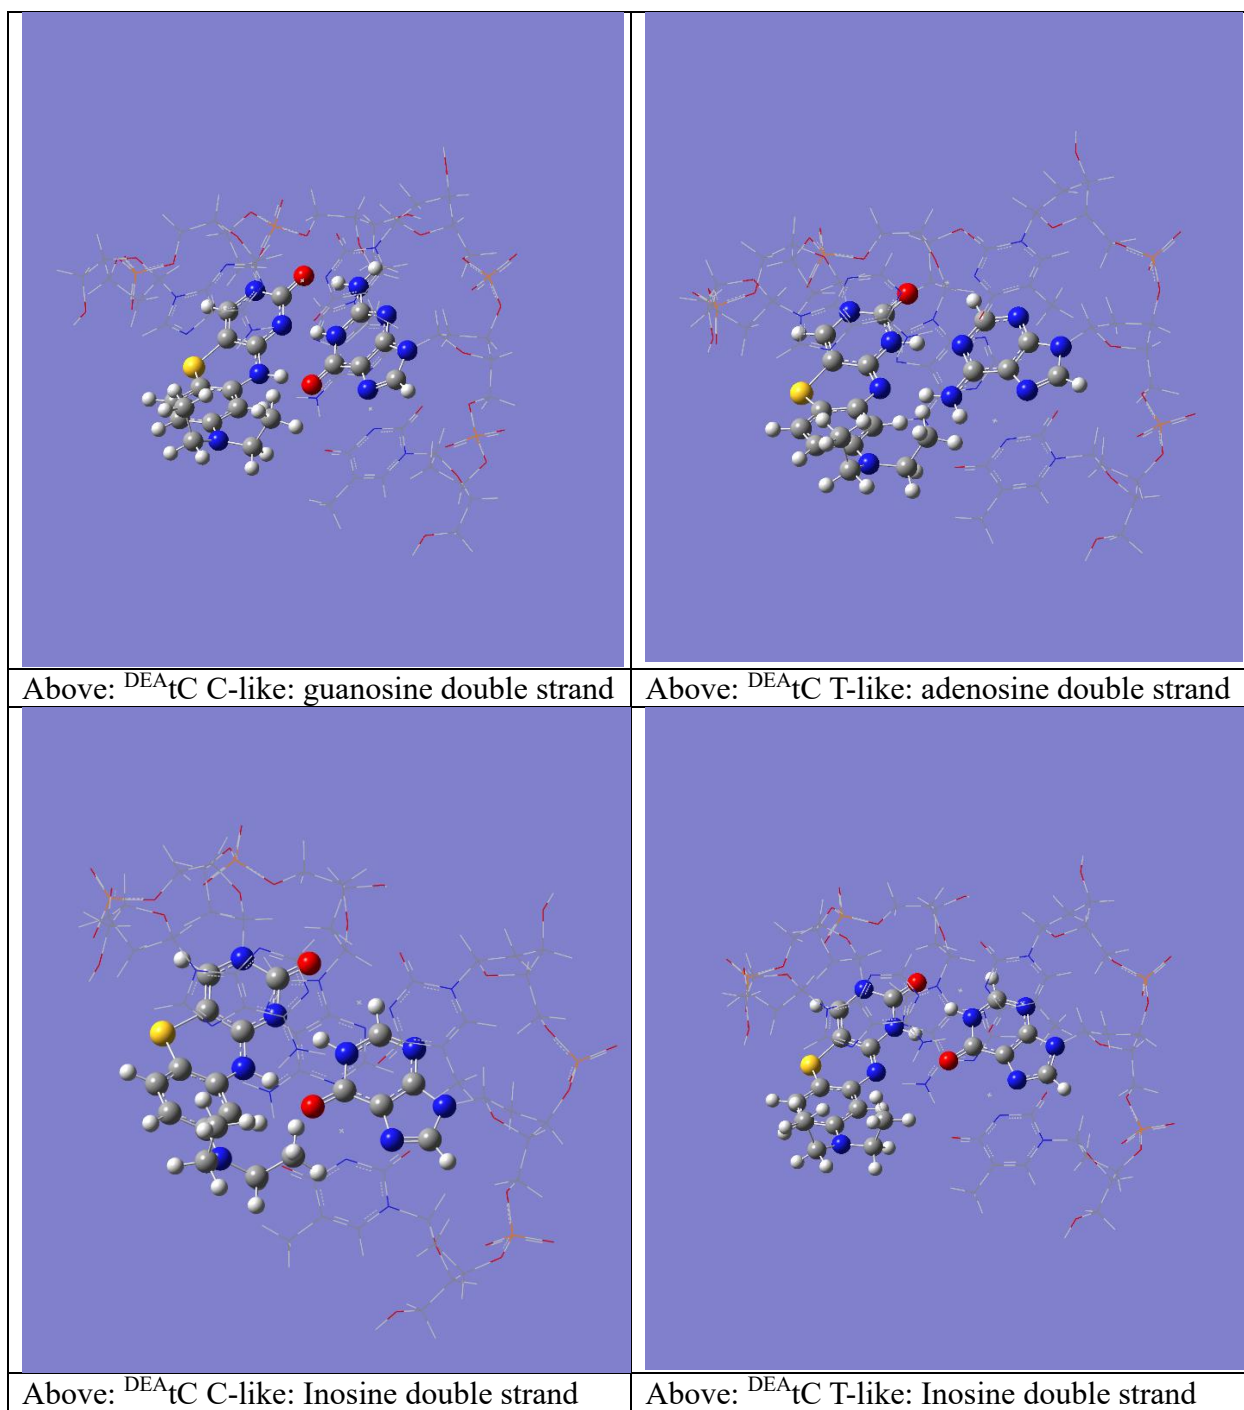

**Table S8.** Monomer TD-B3LYP/aug-cc-pVDZ/SMD absorption wavelength and oscillator strengths, with water as the implicit solvent. These results show convergence in CAM-B3LYP wavelengths to within 1 nm using an aug-cc-pVDZ basis set.

| $\text{DEA}_{\text{tC}}$<br>Monomer | TD-B3LYP/cc-pVDZ/SMD<br>$\lambda_{\text{max,abs}}$ (nm) | TD-B3LYP/aug-cc-pVDZ/SMD<br>$\lambda_{\text{max,abs}}$ (nm) | TD-B3LYP/aug-cc-pVTZ/SMD<br>$\lambda_{\text{max,abs}}$ (nm) | TD-B3LYP/cc-pVDZ/SMD<br>oscillator strength | TD-B3LYP/aug-cc-pVDZ/SMD<br>oscillator strength | TD-B3LYP/aug-cc-pVTZ/SMD<br>oscillator strength |
|-------------------------------------|---------------------------------------------------------|-------------------------------------------------------------|-------------------------------------------------------------|---------------------------------------------|-------------------------------------------------|-------------------------------------------------|
| C-like                              | 396                                                     | 419                                                         | 419                                                         | 0.0354                                      | 0.0254                                          | 0.0252                                          |
| T-like                              | 419                                                     | 443                                                         | 443                                                         | 0.0974                                      | 0.083                                           | 0.0825                                          |

**Table S9.** Monomer TD-CAM-B3LYP/aug-cc-pVDZ/SMD absorption wavelength and oscillator strengths, with water as the implicit solvent. These results show convergence in TD-CAM-B3LYP wavelengths to within 1 nm using an aug-cc-pVDZ basis set.

| $\text{DEA}_{\text{tC}}$<br>Monomer | TD-CAM-B3LYP/cc-pVDZ/SMD<br>$\lambda_{\text{max,abs}}$ (nm) | TD-CAM-B3LYP/aug-cc-pVDZ/SMD<br>$\lambda_{\text{max,abs}}$ (nm) | TD-CAM-B3LYP/aug-cc-pVTZ/SMD<br>$\lambda_{\text{max,abs}}$ (nm) | TD-CAM-B3LYP/cc-pVDZ/SMD<br>oscillator strength | TD-CAM-B3LYP/aug-cc-pVDZ/SMD<br>oscillator strength | TD-CAM-B3LYP/aug-cc-pVTZ/SMD<br>oscillator strength |
|-------------------------------------|-------------------------------------------------------------|-----------------------------------------------------------------|-----------------------------------------------------------------|-------------------------------------------------|-----------------------------------------------------|-----------------------------------------------------|
| C-like                              | 327                                                         | 342                                                             | 343                                                             | 0.0886                                          | 0.0706                                              | 0.0663                                              |
| T-like                              | 361                                                         | 378                                                             | NA                                                              | 0.2002                                          | 0.1774                                              | NA                                                  |

**Table S10.** ONIOM and QM calculated absorption wavelengths base paired and base stacked ONIOM models. TD-B3LYP/aug-cc-pVDZ/SMD and TD-CAM-B3LYP/aug-cc-pVDZ/SMD absorption wavelengths, with water as the implicit solvent and a UFF forcefield included in an ONIOM scheme for the low level system. Monomers do not use the ONIOM method.

| <sup>DEA</sup> tC<br>tautomer<br>system | TD-B3LYP/aug-cc-<br>pVDZ/SMD:UFF<br>$\lambda_{\text{max,abs}}$ (nm) | TD-B3LYP/aug-<br>cc-pVDZ/SMD<br>$\lambda_{\text{max,abs}}$ (nm) | TD-CAM-<br>B3LYP/aug-cc-<br>pVDZ/SMD:UFF<br>$\lambda_{\text{max,abs}}$ (nm) | TD-CAM-<br>B3LYP/aug-cc-<br>pVDZ/SMD<br>$\lambda_{\text{max,abs}}$ (nm) |
|-----------------------------------------|---------------------------------------------------------------------|-----------------------------------------------------------------|-----------------------------------------------------------------------------|-------------------------------------------------------------------------|
| <sup>DEA</sup> tC C-like                | NA                                                                  | 419                                                             | NA                                                                          | 342                                                                     |
| <sup>DEA</sup> tC T-like                | NA                                                                  | 443                                                             | NA                                                                          | 378                                                                     |
| C-like AXA<br>DNA with<br>backbone      | 444                                                                 | NA                                                              | 356                                                                         | NA                                                                      |
| T-like AXA<br>DNA with<br>backbone      | 452                                                                 | 452                                                             | 378                                                                         | 378                                                                     |
| C-like:G<br>AXA DNA<br>with<br>backbone | 447                                                                 | 447                                                             | 356                                                                         | 356                                                                     |
| T-like:A<br>AXA DNA<br>with<br>backbone | 449                                                                 | 450                                                             | 377                                                                         | 378                                                                     |
| C-like:I<br>AXA DNA<br>with<br>backbone | 442                                                                 | 442                                                             | 353                                                                         | 353                                                                     |
| T-like:I<br>AXA DNA<br>with<br>backbone | 434                                                                 | 434                                                             | 364                                                                         | 364                                                                     |



**Table S11.** Relative tautomer stability and electronic energies. B3LYP/aug-cc-pVDZ/SMD single point energies and energy differences with water as the implicit solvent and a UFF forcefield included in an ONIOM scheme for the low level system. Monomers do not use the ONIOM method.

| DEA <sub>t</sub> C | Electronic energy                          |              | Relative energy           |
|--------------------|--------------------------------------------|--------------|---------------------------|
|                    | B3LYP_aug-cc-pVDZ//B3LYP/cc-pVDZ ( $E_h$ ) |              | (kcal mol <sup>-1</sup> ) |
| tautomer           | C-like                                     | T-like       | (C-like)-(T-like)         |
| monomer            | -1275.117414                               | -1275.107733 | -6                        |
| AXA DNA ss         | -1235.585093                               | -1235.577553 | -5                        |
| AXA-G DNA ds       | -1691.643756                               | —            | —                         |
| AXA-A DNA ds       | —                                          | -1616.359322 | —                         |
| AXA-I DNA ds       | -1636.243297                               | -1636.199295 | -28                       |

## References

- (1) Turner, M. B.; Anderson, B. A.; Samaan, G. N.; Coste, M.; Burns, D. D.; Purse, B. W. Synthesis of Fluorescence Turn-On DNA Hybridization Probe Using the DEA TC 2 - Deoxycytidine Analog. *Curr. Protoc. Nucleic Acid Chem.* **2018**, e59. <https://doi.org/10.1002/cpnc.59>.
- (2) Dennington, Roy; Keith, Todd A.; Millam, John M. *GaussView*, Ver. 6, Semichem Inc., Shawnee Mission, KS, **2016**.
- (3) Frisch, M. J.; Trucks, G. W.; Schlegel, H. B.; Scuseria, G. E.; Robb, M. A.; Cheeseman, J. R.; Scalmani, G.; Barone, V.; Petersson, G. A.; Nakatsuji, H.; Li, X.; Caricato, M.; Marenich, A. V.; Bloino, J.; Janesko, B. G.; Gomperts, R.; Mennucci, B.; Hratchian, H. P.; Ortiz, J. V.; Izmaylov, A. F.; Sonnenberg, J. L.; Williams-Young, D.; Ding, F.; Lipparini, F.; Egidi, F.; Goings, J.; Peng, B.; Petrone, A.; Henderson, T.; Ranasinghe, D.; Zakrzewski, V. G.; Gao, J.; Rega, N.; Zheng, G.; Liang, W.; Hada, M.; Ehara, M.; Toyota, K.; Fukuda, R.; Hasegawa, J.; Ishida, M.; Nakajima, T.; Honda, Y.; Kitao, O.; Nakai, H.; Vreven, T.; Throssell, K.; Montgomery, J. A., Jr.; Peralta, J. E.; Ogliaro, F.; Bearpark, M. J.; Heyd, J. J.; Brothers, E. N.; Kudin, K. N.; Staroverov, V. N.; Keith, T. A.; Kobayashi, R.; Normand, J.; Raghavachari, K.; Rendell, A. P.; Burant, J. C.; Iyengar, S. S.; Tomasi, J.; Cossi, M.; Millam, J. M.; Klene, M.; Adamo, C.; Cammi, R.; Ochterski, J. W.; Martin, R. L.; Morokuma, K.; Farkas, O.; Foresman, J. B.; Fox, D. J. *Gaussian* 16 Revision C.01, 2016.
- (4) *DNA Sequence to Structure*; Supercomputing Facility for Bioinformatics & Computational Biology, IIT Delhi. <https://scfbio-iitd.res.in/software/drugdesign/bdna.jsp> (accessed 9-13-2025)
- (5) Arnott S.; Campbell-Smith P.J.; Chandrasekaran R.; *Nucleic Acids*, Vol. 2; 3<sup>rd</sup> ed.; Handbook of Biochemistry and Molecular Biology, G.P. Fasman, Ed. Cleveland: CRC Press; 1976; pp. 411-422.
